# Supplementary material for: Conversion of plastic waste into fuel oil using zeolite catalysts in a bench-scale pyrolysis reactor
Source: Royal Society of Chemistry journal article supplement (doi:10.1039/d1ra08673a), 2022-01-01
Supplement: d1ra08673a1.pdf [file d1ra08673a1.pdf]

## Supporting Information

### Conversion of plastic waste into fuel oil using zeolite catalysts in a bench scale pyrolysis reactor

Krishnasamy Sivagami<sup>1,4</sup>, Keshav V Kumar<sup>3</sup>, Perumal Tamizhdurai<sup>2\*</sup>,

Dhivakar Govindarajan<sup>1</sup>, Madhiyazhagan Kumar<sup>3</sup>, Indumathi Nambi<sup>\*1,3</sup>

<sup>1</sup>Environmental and Water Resources Division, Department of Civil Engineering, Indian Institute of Technology Madras, Chennai- 600 036

<sup>2</sup>Department of Chemistry, Dwaraka Doss Goverdhan Doss Vaishnav College (Autonomous), E.V.R. Periyar Road, Arumbakkam, Chennai, Tamil Nadu 600 106, India

<sup>3</sup>Samudhyoga Waste Chakra Private Limited, IIT Madras Research Park, Tharamani, Chennai – 600 113, India.

<sup>4</sup>Industrial Ecology Group, School of Chemical Engineering, Vellore Institute of Technology, Vellore – 632 014, Tamil Nadu, India

**\*Corresponding author:**

Dr.P.Tamizhdurai: Tel: +91-9677146579 Email: [p.tamizhdurai@dgvaishnavcollege.edu.in](mailto:p.tamizhdurai@dgvaishnavcollege.edu.in)

Dr. Indumathi M. Nambi Tel: +91-44-2257 4289 Email: [indunambi23@iitm.ac.in](mailto:indunambi23@iitm.ac.in)

**Fig. S1.** GC-MS Chromatogram of different pyrolysis oil.

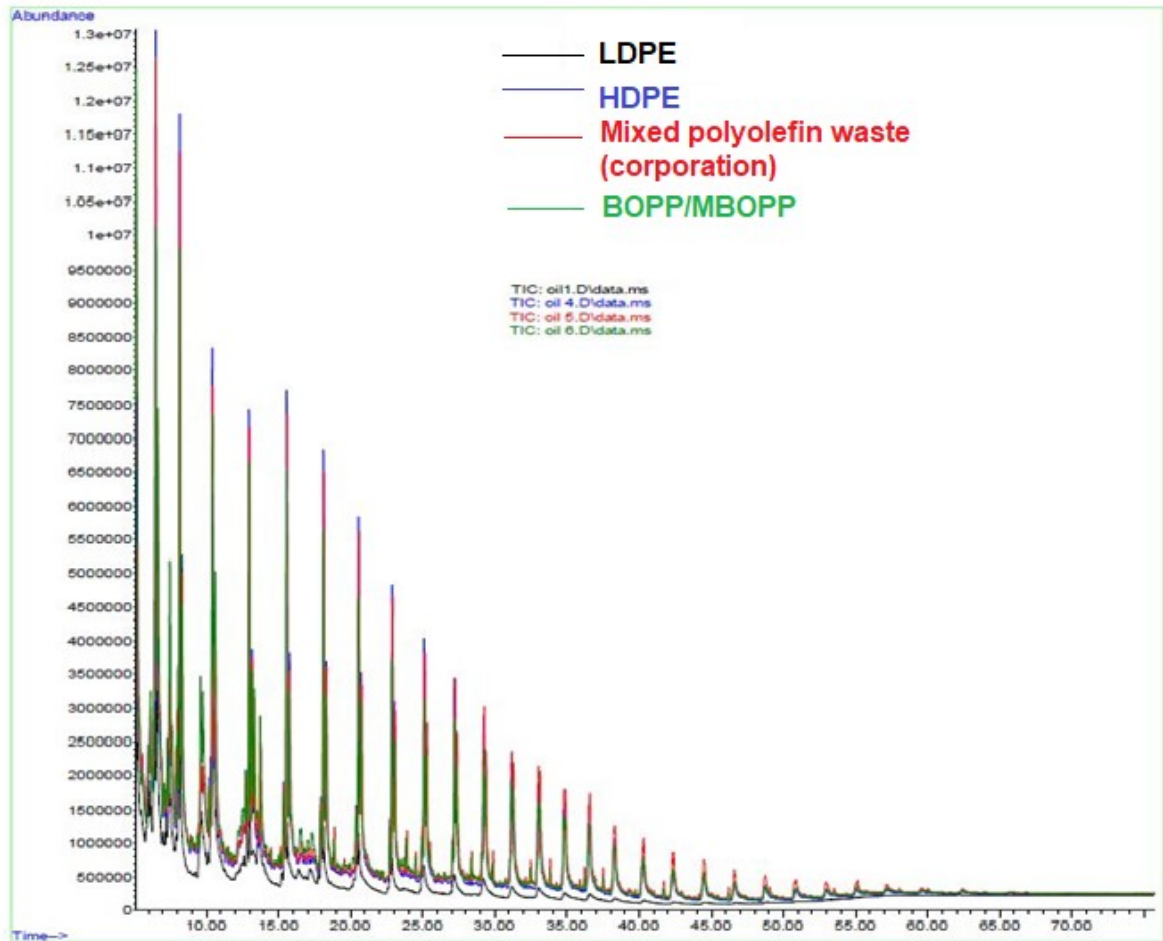

Figure S1
